# Supplementary material for: Unravelling the doping effect of potassium ions on structural modulation and photocatalytic activity of graphitic carbon nitride
Source: Royal Society of Chemistry journal article supplement (doi:10.1039/d3ra00934c), 2023-01-01
Supplement: d3ra00934c1.pdf [file d3ra00934c1.pdf]

## Supporting Information

### Unravelling the Doping Effect of Potassium Ions on Structural Modulation and Photocatalytic Activity of Graphitic Carbon Nitride

Chengyu Peng, Rong Lu\* and Anchi Yu\*

*Department of Chemistry, Renmin University of China, Beijing 100872, P. R. China*

Additional tables and figures

Additional tables

**Table S1** Position and the FWHM of (002) peak for all samples.

| Sample                     | Peak position (°) | FWHM (°) |
|----------------------------|-------------------|----------|
| GCN                        | 27.4              | 1.6      |
| GCN-K <sub>0.75</sub> -500 | 27.4              | 1.9      |
| GCN-K <sub>0.25</sub> -530 | 27.5              | 1.9      |
| GCN-K <sub>0.75</sub> -530 | 27.5              | 2.1      |
| GCN-K <sub>2.25</sub> -530 | 27.5              | 2.3      |
| GCN-K <sub>0.75</sub> -540 | 27.5              | 3.6      |
| GCN-K <sub>0</sub> -550    | 27.5              | 1.3      |
| GCN-K <sub>0.75</sub> -550 | 28.0              | 4.5      |
| GCN-K <sub>0.25</sub> -560 | 27.5              | 3.2      |
| GCN-K <sub>0.75</sub> -560 | 28.2              | 0.7      |
| GCN-K <sub>1.00</sub> -560 | 28.2              | 0.7      |
| GCN-K <sub>1.50</sub> -560 | 28.2              | 0.7      |
| GCN-K <sub>2.25</sub> -560 | 28.2              | 1.2      |

**Table S2** K<sup>+</sup> contents of GCN-K<sub>0.75</sub>-560 and GCN-K<sub>0.75</sub>-560-HCl according to SEM-EDS.

| Sample                         | K(at. %)    |
|--------------------------------|-------------|
| GCN-K <sub>0.75</sub> -560     | 8.25 ± 1.00 |
| GCN-K <sub>0.75</sub> -560-HCl | 0.37 ± 0.05 |

**Table S3** Chemical compositions (XPS) for GCN, GCN-K<sub>0.75</sub>-530 and GCN-K<sub>0.75</sub>-560.

| Sample                     | C 1s<br>(at.%) | N 1s<br>(at.%) | O 1s<br>(at.%) | K 2p<br>(at.%) | Cl 2p<br>(at.%) |
|----------------------------|----------------|----------------|----------------|----------------|-----------------|
| GCN                        | 45.65          | 51.27          | 3.08           | --             | --              |
| GCN-K <sub>0.75</sub> -530 | 43.31          | 48.89          | 3.82           | 3.87           | 0.1             |
| GCN-K <sub>0.75</sub> -560 | 44.57          | 43.55          | 5.84           | 5.88           | 0.16            |

**Table S4** The fitting parameters of the fluorescence decay with bi-exponential function for GCN, GCN-K<sub>0.75</sub>-530 and GCN-K<sub>0.75</sub>-560.

| $\lambda_{\text{ex}}$ (nm) | Sample                     | $a_1$ | $\tau_1$ (ns) | $a_2$ | $\tau_2$ (ns) | $\langle\tau\rangle$ (ns) |
|----------------------------|----------------------------|-------|---------------|-------|---------------|---------------------------|
|                            | GCN                        | 0.84  | 1.39          | 0.16  | 9.02          | 2.61                      |
| 375                        | GCN-K <sub>0.75</sub> -530 | 0.75  | 0.47          | 0.25  | 2.52          | 0.98                      |
|                            | GCN-K <sub>0.75</sub> -560 | 0.87  | 0.22          | 0.13  | 1.31          | 0.36                      |

**Table S5** H<sub>2</sub> evolution rates for the samples.

| Sample                     | H <sub>2</sub> evolution rate<br>( $\lambda > 420$ nm) $\mu\text{mol/h/20mg}$ |
|----------------------------|-------------------------------------------------------------------------------|
| GCN                        | 1.0                                                                           |
| GCN-K <sub>0.25</sub> -530 | 1.5                                                                           |
| GCN-K <sub>0.75</sub> -530 | 4.4                                                                           |
| GCN-K <sub>2.25</sub> -530 | 2.9                                                                           |
| GCN-K <sub>0.25</sub> -560 | 2.1                                                                           |
| GCN-K <sub>0.75</sub> -560 | 14.3                                                                          |
| GCN-K <sub>2.25</sub> -560 | 8.7                                                                           |

Additional figures and schemes:

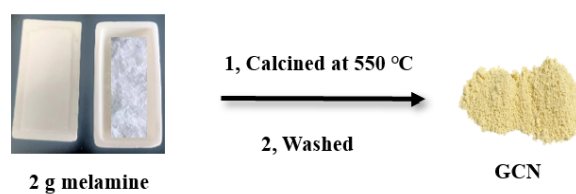

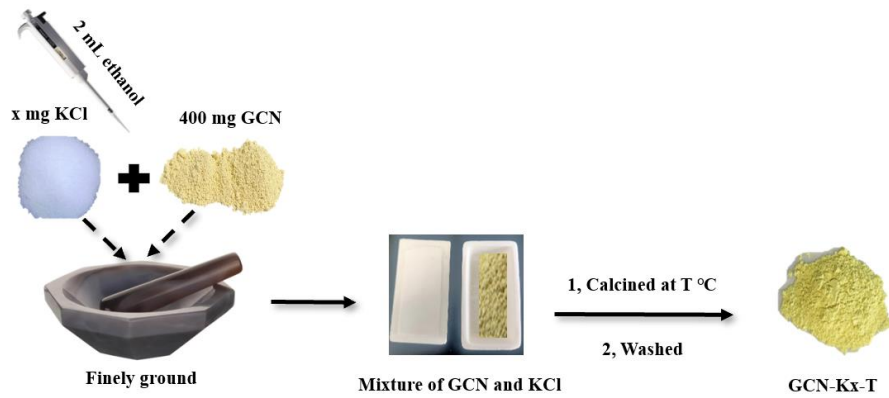

**Scheme S1** Schematic illustration of the preparation of GCN and K<sup>+</sup>-doped sample (GCN-K<sub>x</sub>-T).

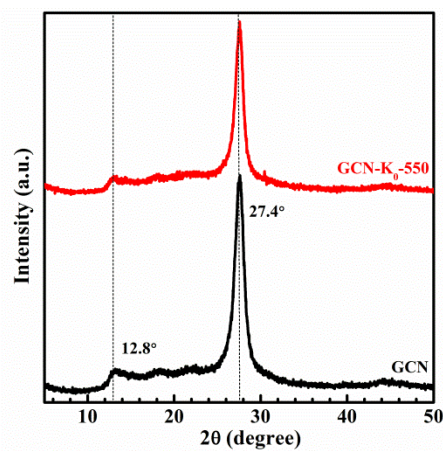

**Fig. S1** XRD patterns of GCN and GCN-K<sub>0</sub>-550.

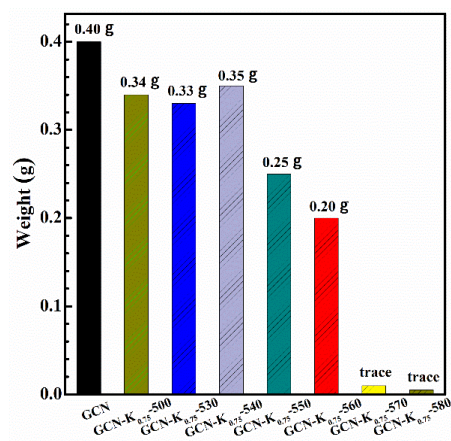

**Fig. S2** Mass yields of K<sup>+</sup>-doped GCNs (weight ratio of KCl/GCN=0.75, GCN: 400 mg) at different calcination temperatures.

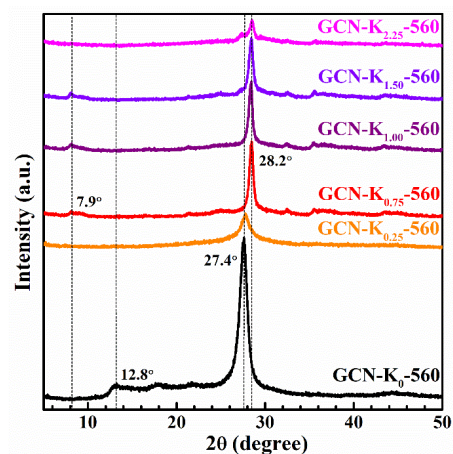

**Fig. S3** XRD patterns of GCN and  $K^+$ -doped GCNs with different weight ratios of KCl to GCN at 560 °C.

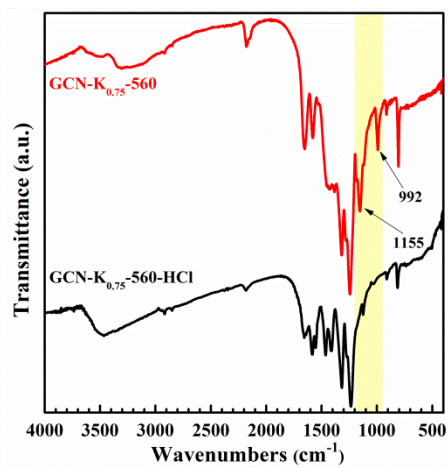

**Fig. S4** FTIR spectra of GCN- $K_{0.75}$ -560 and HCl (0.1 M) treated sample GCN- $K_{0.75}$ -560-HCl.

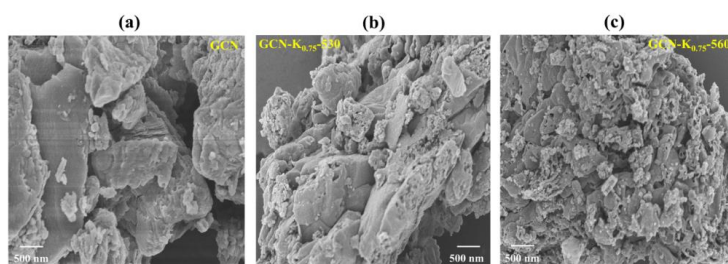

**Fig. S5** SEM images of GCN (a), GCN- $K_{0.75}$ -560 (b) and GCN- $K_{0.75}$ -560 (c).

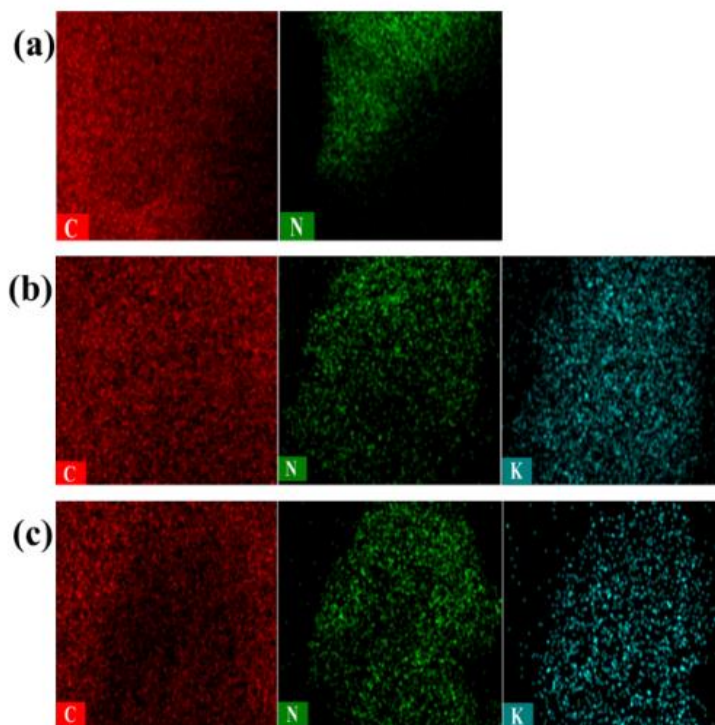

**Fig. S6** Element mapping images of GCN (a), GCN-K<sub>0.75</sub>-530 (b) and GCN-K<sub>0.75</sub>-560 (c).

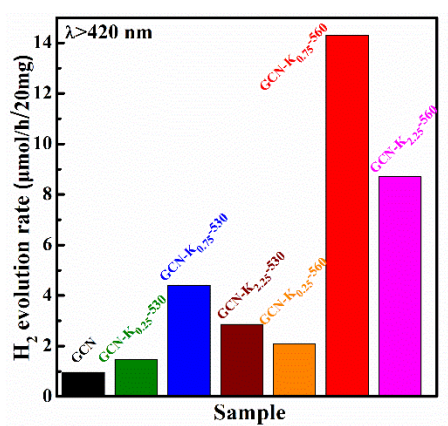

**Fig. S7** Comparison of the photocatalytic H<sub>2</sub> evolution rates of the different photocatalysts.

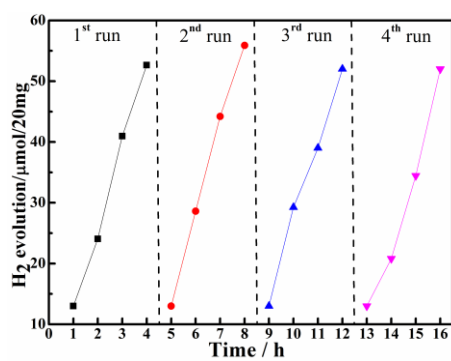

**Fig. S8** Stability test of H<sub>2</sub> evolution for GCN-K<sub>0.75</sub>-560 under visible light (>420 nm) irradiation.

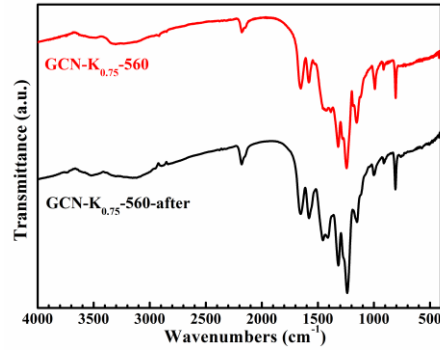

**Fig. S9** FTIR spectra of GCN-K<sub>0.75</sub>-560 before and after photocatalytic H<sub>2</sub> evolution.

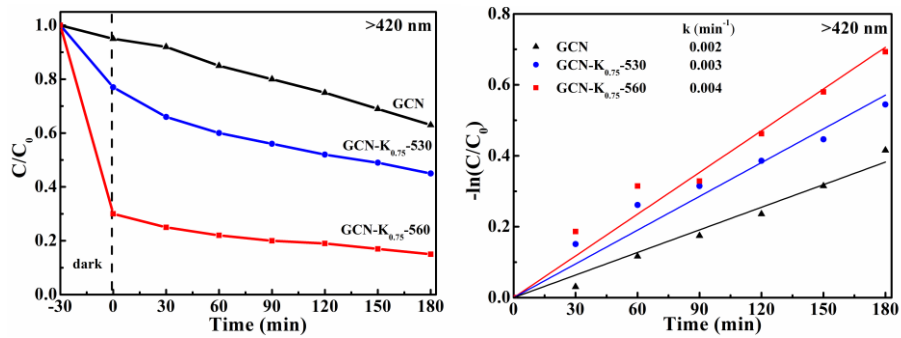

**Fig. S10** (left) Photocatalytic degradation of MB in the absence and presence of catalyst under visible light (>420 nm) irradiation; (right) Plot of  $-\ln(C/C_0)$  against reaction time and photodegradation rates (inset).

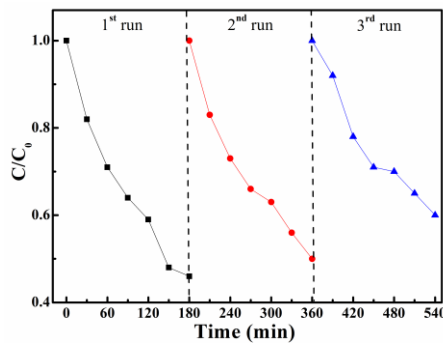

**Fig. S11** Stability test of photocatalytic degradation of MB over GCN-K<sub>0.75</sub>-560 under visible light (>420 nm) irradiation.
